# Supplementary figures and images for: Inflammation and Starvation Affect Housekeeping Gene Stability in Adipose Mesenchymal Stromal Cells
Source: MDPI journal article supplement (doi:10.3390/cimb46010054), 2024-01-19

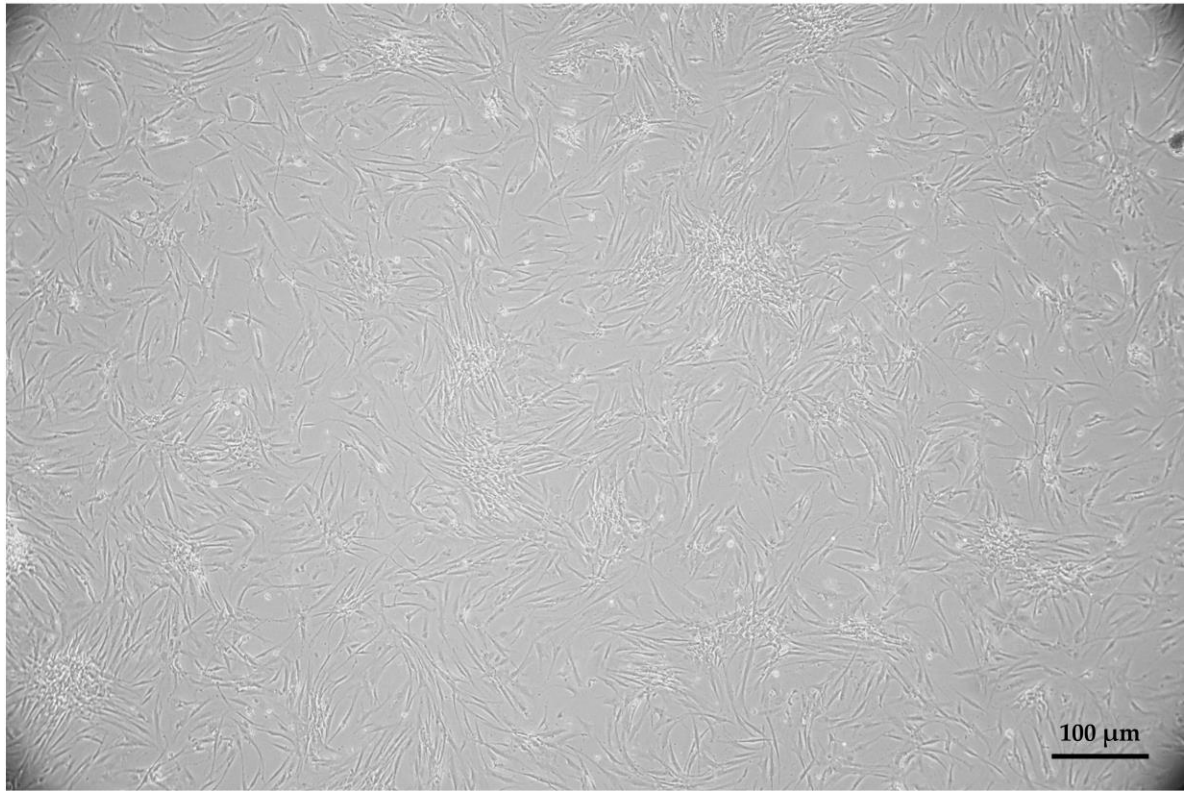

**Figure S1.** ASC morphology confirming fibroblast-like features.

Supplement: s1 [file s1]
